# Supplementary material for: Propionibacterium acnes Induces Intervertebral Disc Degeneration by Promoting iNOS/NO and COX‐2/PGE2 Activation via the ROS‐Dependent NF‐κB Pathway
Source: Hindawi journal article supplement (doi:10.1155/2018/3692752), 2018-01-01
Supplement: f1 [file 3692752.f1.pdf]

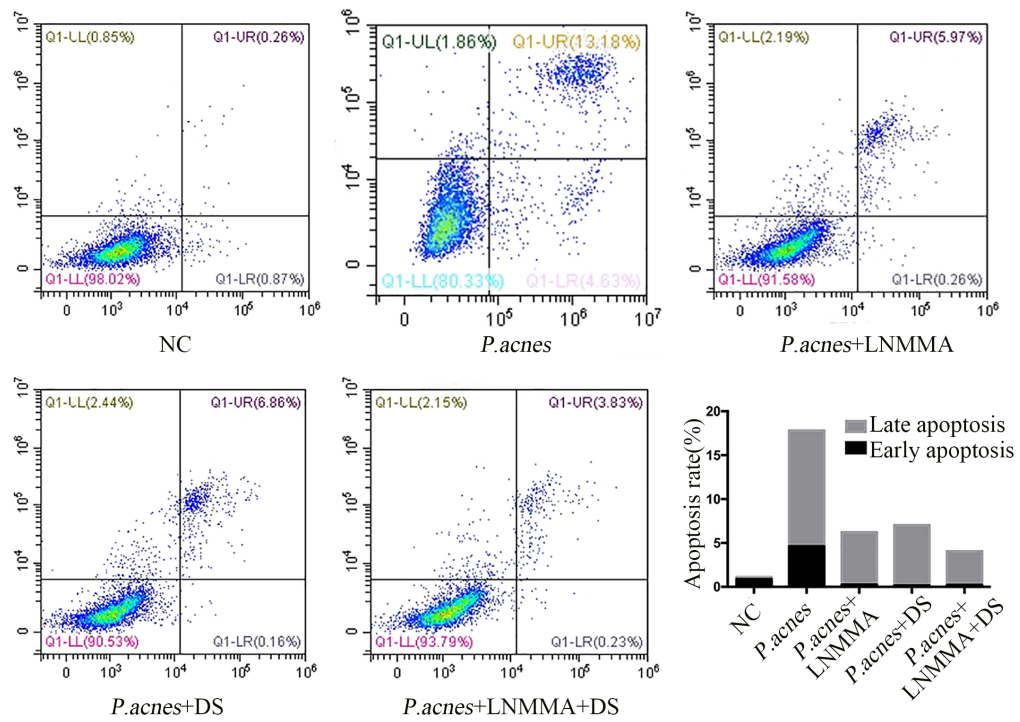

**Supplemental 1. The inhibition of iNOS and/or COX-2 prevent apoptotic cell death of NPCs.** Flow cytometric analysis of apoptosis in NPCs infected with *P. acnes* for 24 hours, pretreated with or without L-NMMA (100  $\mu$ M) and DS (200 nM). DS: Diclofenac Sodium
